# Supplementary material for: CAGEfightR: analysis of 5′-end data using R/Bioconductor
Source: PubMed Central journal article supplement (PMC6778389; doi:10.1186/s12859-019-3029-5), 2019-10-04

**A**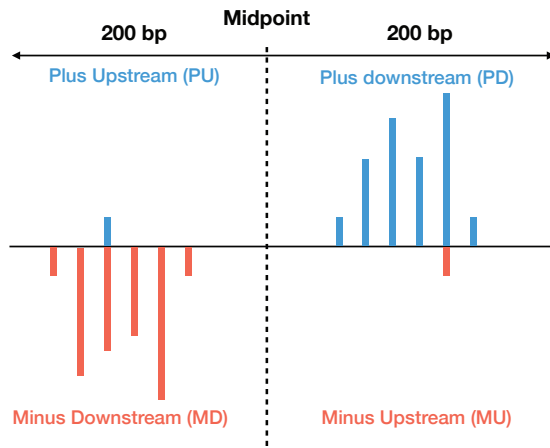

$$E = PD + MD + PU + MU$$

$$BC = \sqrt{\frac{MD}{E} * \frac{1}{2}} + \sqrt{\frac{PD}{E} * \frac{1}{2}}$$

**B** Overlap between enhancer predictions and open chromatin in HeLa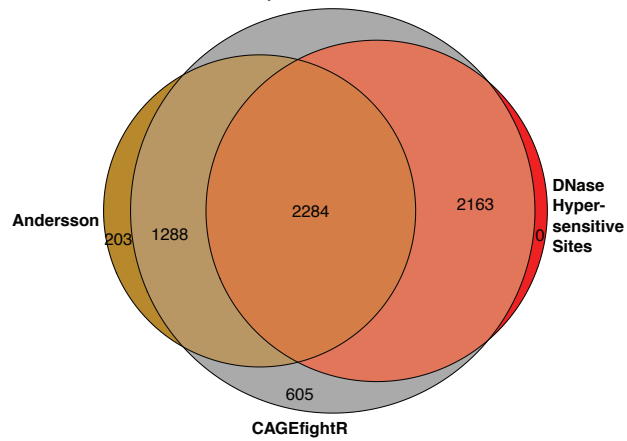**C**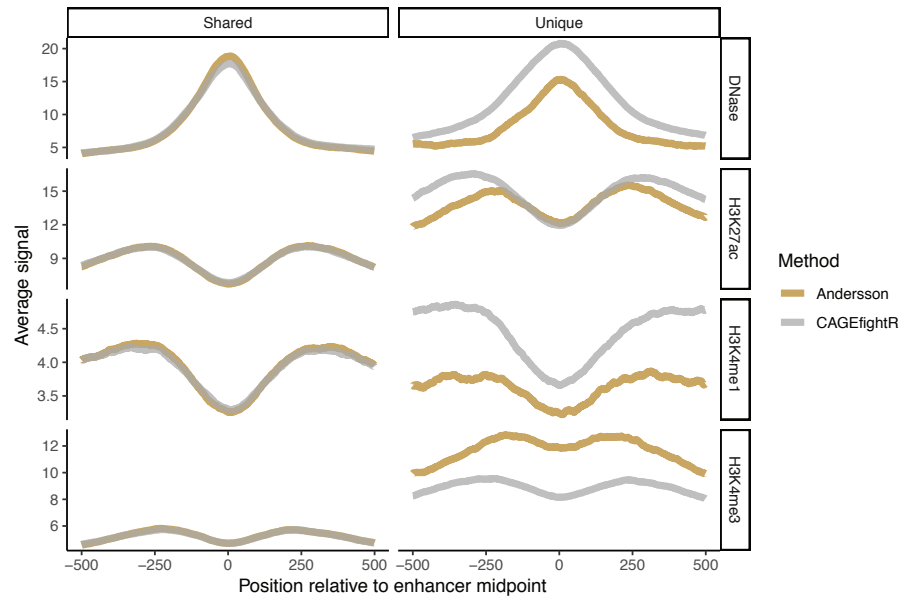

Supplement: 12859_2019_3029_MOESM1_ESM.pdf [file 12859_2019_3029_MOESM1_ESM.pdf]
